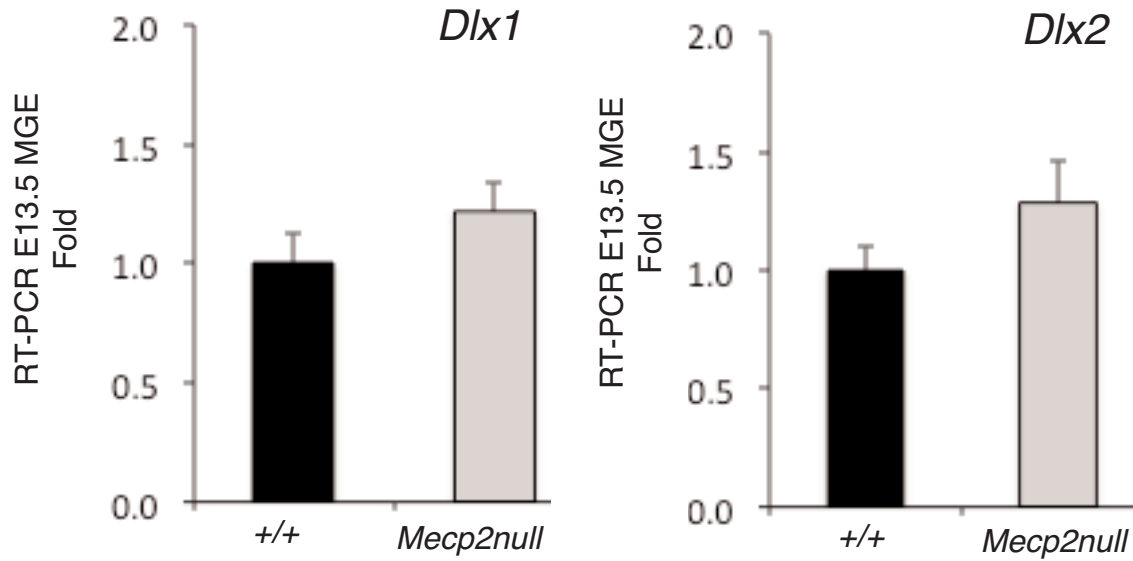

**Supplemental Figure 1. *Mecp2* does not repress *Dlx1* or *Dlx2*.** E13.5 MGE qRT-PCR from *+/+* and *Mecp2null* littermates compare levels of *Dlx1* and *Dlx2* transcripts. *+/+* (Black bars) *MECP2null* (gray bars). n= 3 for each genotype.  $p > 0.05$  for *Dlx1* and *Dlx2*. No significant differences are detected in *Dlx1* or *Dlx2* mRNA levels upon loss of *Mecp2*.
